# Supplementary material
Source: MDPI journal article supplement (https://www.mdpi.com/2073-4344/10/5/538)

# Enzymatic synthesis of *O*-methylated phenophospholipids by lipase-catalyzed acidolysis of egg-yolk phosphatidylcholine with anisic and veratric acids

Marta Okulus <sup>1,\*</sup>, Anna Gliszczyńska <sup>1,\*</sup>

Department of Chemistry, Wrocław University of Environmental and Life Sciences, Norwida 25, 50-375 Wrocław, Poland; marta.okulus@gmail.com (M.O.); anna.gliszczyńska@wp.pl (A.G.)

\* Correspondence: anna.gliszczyńska@wp.pl (A.G.), marta.okulus@gmail.com (M.O.); Tel.: +48-71-320-5183

Received: date; Accepted: date; Published: date

## Content

|                                                                                                     |   |
|-----------------------------------------------------------------------------------------------------|---|
| Figure S1: HPLC chromatogram of ANISA-PC. ....                                                      | 2 |
| Figure S2: HPLC chromatogram of ANISA-LPC. ....                                                     | 3 |
| Figure S3: GC chromatogram of fatty acid composition of modified phospholipid fraction PC/LPC. .... | 4 |

Figure S1: HPLC chromatogram of ANISA-PC.

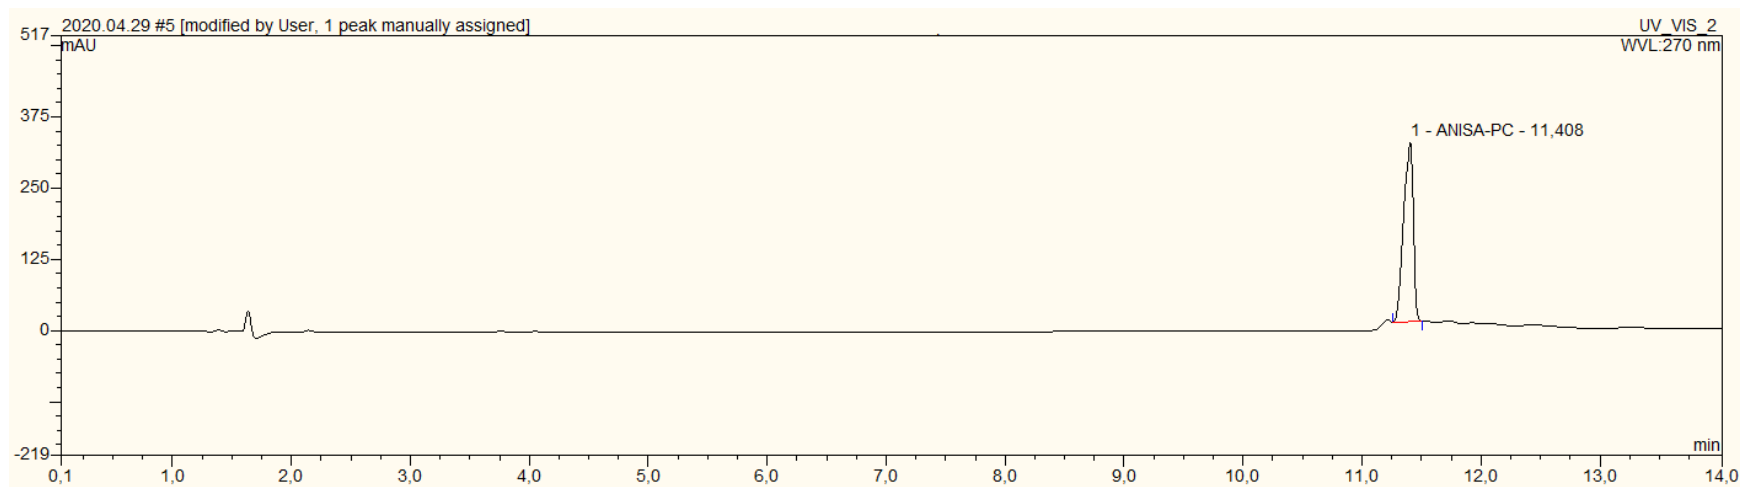

Figure S2: HPLC chromatogram of ANISA-LPC.

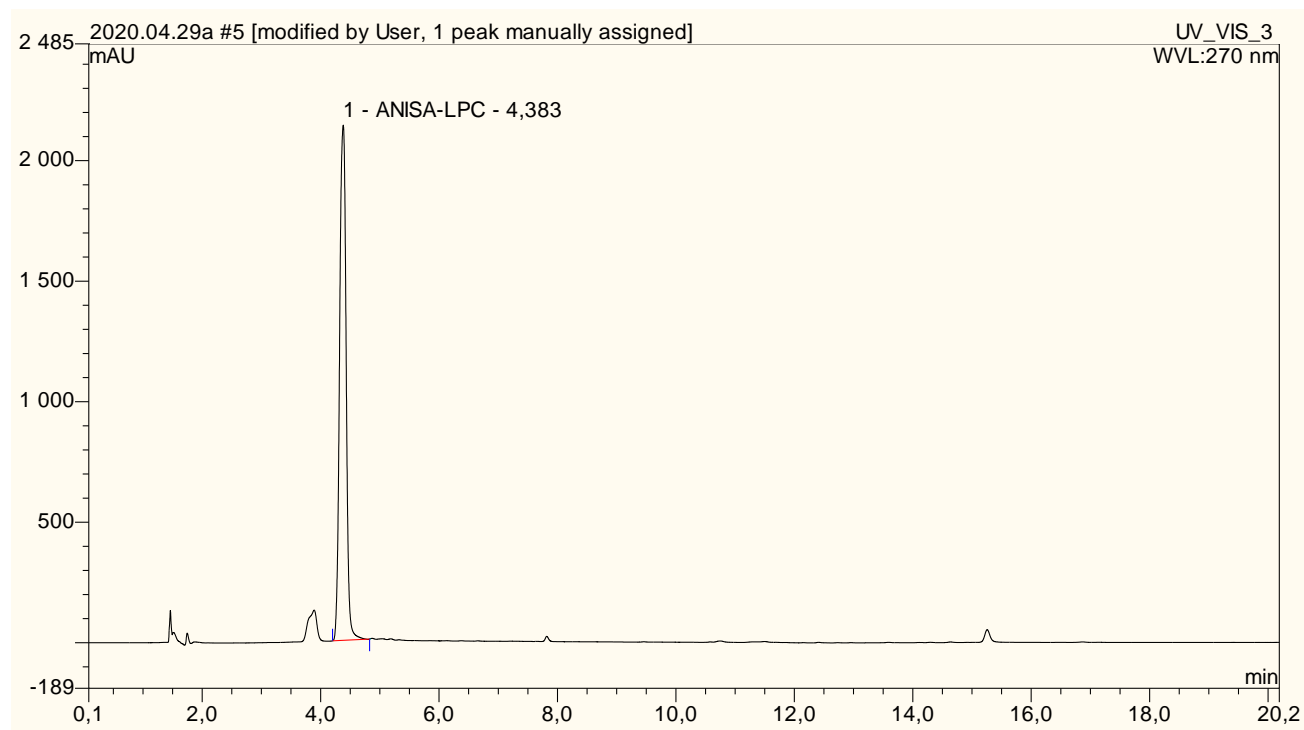

Figure S3: GC chromatogram of fatty acid composition of modified phospholipid fraction PC/LPC.

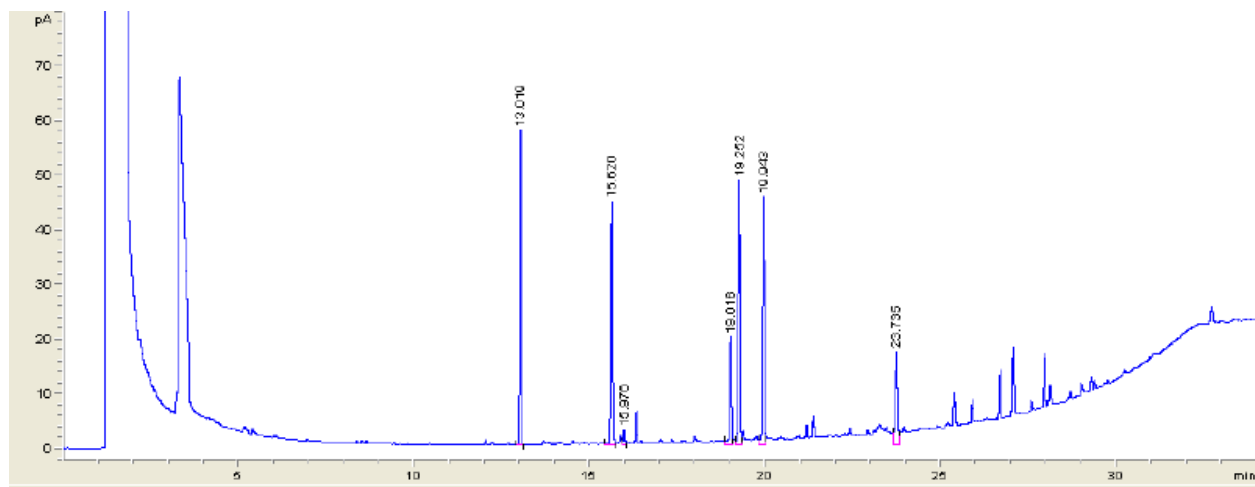

Supplement: s1 [file s1]
